# Supplementary material for: Machine learning in laser-induced breakdown spectroscopy as a novel approach towards experimental parameter optimization
Source: Royal Society of Chemistry journal article supplement (doi:10.1039/d1ja00389e), 2022-01-01
Supplement: d1ja00389e1.pdf [file d1ja00389e1.pdf]

## Supplementary material

List of selected spectral lines characteristics – NIST 1411 glass.

| Element | $\lambda$ (nm) | Z  | Ei (eV) | Ek (eV) | Ak (s-1) | gi (-) | gk (-) | C (%) |
|---------|----------------|----|---------|---------|----------|--------|--------|-------|
| Mg II   | 279.55         | 12 | 0.00    | 4.43    | 2.60E+08 | 2      | 4      | 0.14  |
| Ba II   | 493.41         | 56 | 0.00    | 2.51    | 9.53E+07 | 2      | 2      | 4.06  |
| Mg II   | 280.27         | 12 | 0.00    | 4.42    | 2.57E+08 | 2      | 2      | 0.14  |
| Sr II   | 421.55         | 38 | 0.00    | 2.94    | 1.28E+08 | 2      | 2      | 0.07  |
| Ca II   | 393.37         | 20 | 0.00    | 3.15    | 1.47E+08 | 2      | 4      | 1.21  |
| Ca II   | 396.85         | 20 | 0.00    | 3.12    | 1.40E+08 | 2      | 2      | 1.21  |
| Ba II   | 455.40         | 56 | 0.00    | 2.72    | 1.11E+08 | 2      | 4      | 4.06  |
| Si II   | 413.09         | 14 | 9.84    | 12.84   | 1.74E+08 | 6      | 8      | 27.09 |
| Ca II   | 315.89         | 20 | 3.12    | 7.05    | 3.10E+08 | 2      | 4      | 1.21  |
| Si I    | 288.16         | 14 | 0.78    | 5.08    | 2.17E+08 | 5      | 3      | 27.09 |
| K I     | 766.49         | 19 | 0.00    | 1.62    | 3.78E+07 | 2      | 4      | 2.46  |
| Na I    | 589.00         | 11 | 0.00    | 2.10    | 6.16E+07 | 2      | 4      | 7.52  |
| Al I    | 309.27         | 13 | 0.01    | 4.02    | 7.29E+07 | 4      | 6      | 2.95  |
| Al I    | 394.40         | 13 | 0.00    | 3.14    | 4.99E+07 | 2      | 2      | 2.95  |
| Zn I    | 330.26         | 30 | 4.03    | 7.78    | 1.20E+08 | 3      | 5      | 2.58  |
| Mg I    | 285.21         | 12 | 0.00    | 4.35    | 4.91E+08 | 5      | 3      | 0.14  |
| Zn I    | 334.50         | 30 | 4.08    | 7.78    | 1.70E+08 | 5      | 7      | 2.58  |
| Al I    | 396.15         | 13 | 0.01    | 3.14    | 9.85E+07 | 4      | 2      | 2.95  |
| B I     | 249.77         | 5  | 0.00    | 4.96    | 1.68E+08 | 4      | 2      | 3.44  |
| Mg I    | 389.19         | 12 | 7.17    | 10.36   | 1.77E+08 | 3      | 5      | 0.14  |
| Mg I    | 285.21         | 12 | 0.00    | 4.35    | 4.91E+08 | 1      | 3      | 0.14  |
| Ca I    | 422.67         | 20 | 0.00    | 2.93    | 2.18E+08 | 1      | 3      | 1.21  |

List of selected spectral lines characteristics – EB316 aluminum alloy.

| Element | $\lambda$ (nm) | Z  | Ei (eV) | Ek (eV) | Ak (s-1) | gi (-) | gk (-) | C (%) |
|---------|----------------|----|---------|---------|----------|--------|--------|-------|
| Mg II   | 279.55         | 12 | 0.00    | 4.43    | 2.60E+08 | 2      | 4      | 0.05  |
| Mg II   | 280.27         | 12 | 0.00    | 4.42    | 2.57E+08 | 2      | 2      | 0.05  |
| Sr II   | 421.55         | 38 | 0.00    | 2.94    | 1.28E+08 | 2      | 2      | 0.03  |
| Si II   | 413.09         | 14 | 9.84    | 12.84   | 1.74E+08 | 6      | 8      | 11.98 |
| Si I    | 288.16         | 14 | 0.78    | 5.08    | 2.17E+08 | 5      | 3      | 11.98 |
| Al I    | 309.27         | 13 | 0.01    | 4.02    | 7.29E+07 | 4      | 6      | 87.00 |
| Al I    | 394.40         | 13 | 0.00    | 3.14    | 4.99E+07 | 2      | 2      | 87.00 |
| Zn I    | 330.26         | 30 | 4.03    | 7.78    | 1.20E+08 | 3      | 5      | 0.06  |
| Zn I    | 334.50         | 30 | 4.08    | 7.78    | 1.70E+08 | 5      | 7      | 0.06  |
| Al I    | 396.15         | 13 | 0.01    | 3.14    | 9.85E+07 | 4      | 2      | 87.00 |
| Si I    | 288.16         | 14 | 0.78    | 5.08    | 2.17E+08 | 5      | 3      | 11.98 |

|       |        |    |      |      |          |    |   |      |
|-------|--------|----|------|------|----------|----|---|------|
| Mg I  | 285.21 | 12 | 0.00 | 4.35 | 4.91E+08 | 1  | 3 | 0.05 |
| Fe I  | 404.58 | 26 | 1.48 | 4.55 | 8.62E+07 | 9  | 9 | 0.11 |
| Fe I  | 406.36 | 26 | 1.56 | 4.61 | 6.65E+07 | 9  | 7 | 0.11 |
| Cu I  | 324.75 | 29 | 0.00 | 3.82 | 1.40E+08 | 2  | 4 | 0.03 |
| Cu I  | 327.40 | 29 | 0.00 | 3.79 | 1.38E+08 | 2  | 2 | 0.03 |
| Mn I  | 403.08 | 25 | 0.00 | 3.08 | 1.70E+07 | 6  | 8 | 0.20 |
| Mn II | 294.92 | 25 | 1.17 | 5.38 | 1.96E+08 | 5  | 7 | 0.20 |
| Ni I  | 301.20 | 28 | 0.42 | 4.54 | 1.30E+08 | 5  | 5 | 0.02 |
| Ni I  | 352.45 | 28 | 0.03 | 3.54 | 1.00E+08 | 7  | 5 | 0.02 |
| Ni II | 231.60 | 28 | 1.04 | 6.39 | 2.88E+08 | 10 | 8 | 0.02 |

List of selected spectral lines characteristics – SUS-1R steel alloy.

| Element | $\lambda$ (nm) | Z  | Ei (eV) | Ek (eV) | Ak (s-1) | gi (-) | gk (-) | C (%) |
|---------|----------------|----|---------|---------|----------|--------|--------|-------|
| Fe I    | 368.75         | 26 | 0.86    | 4.22    | 8.00E+06 | 7      | 9      | 88.91 |
| Fe I    | 372.26         | 26 | 0.09    | 3.42    | 4.97E+06 | 3      | 5      | 88.91 |
| Fe I    | 372.76         | 26 | 0.96    | 4.28    | 2.24E+07 | 7      | 5      | 88.91 |
| Fe I    | 373.49         | 26 | 0.86    | 4.18    | 9.01E+07 | 11     | 11     | 88.91 |
| Fe I    | 373.71         | 26 | 0.05    | 3.37    | 1.41E+07 | 7      | 9      | 88.91 |
| Fe I    | 374.34         | 26 | 0.99    | 4.30    | 2.60E+07 | 9      | 3      | 88.91 |
| Fe I    | 374.95         | 26 | 0.91    | 4.22    | 7.63E+07 | 9      | 9      | 88.91 |
| Fe I    | 375.82         | 26 | 0.96    | 4.26    | 6.34E+07 | 11     | 7      | 88.91 |
| Fe I    | 376.38         | 26 | 0.99    | 4.28    | 5.44E+07 | 1      | 5      | 88.91 |
| Fe I    | 376.55         | 26 | 3.24    | 6.53    | 9.51E+07 | 13     | 15     | 88.91 |
| Fe I    | 382.04         | 26 | 0.86    | 4.10    | 6.67E+07 | 11     | 9      | 88.91 |
| Fe I    | 382.78         | 26 | 1.56    | 4.80    | 1.05E+08 | 11     | 5      | 88.91 |
| Fe I    | 387.25         | 26 | 0.99    | 4.19    | 1.05E+07 | 5      | 5      | 88.91 |
| Fe I    | 389.97         | 26 | 0.09    | 3.27    | 2.58E+06 | 5      | 5      | 88.91 |
| Fe I    | 390.29         | 26 | 1.56    | 4.73    | 2.14E+07 | 7      | 7      | 88.91 |
| Fe I    | 404.58         | 26 | 1.48    | 4.55    | 8.62E+07 | 9      | 9      | 88.91 |
| Fe I    | 406.36         | 26 | 1.56    | 4.61    | 6.65E+07 | 9      | 7      | 88.91 |
| Cr I    | 425.44         | 24 | 0.00    | 2.91    | 3.15E+07 | 7      | 9      | 1.70  |
| Si I    | 288.16         | 14 | 0.78    | 5.08    | 2.17E+08 | 5      | 3      | 0.8   |
| Mo I    | 379.83         | 42 | 0.00    | 3.26    | 6.90E+07 | 7      | 9      | 0.90  |
| Ni I    | 301.20         | 28 | 0.42    | 4.54    | 1.30E+08 | 5      | 5      | 2.90  |
| Ni I    | 352.45         | 28 | 0.03    | 3.54    | 1.00E+08 | 7      | 5      | 2.90  |
| Ni II   | 231.60         | 28 | 1.04    | 6.39    | 2.88E+08 | 10     | 8      | 2.90  |
| Cu I    | 324.75         | 29 | 0.00    | 3.82    | 1.40E+08 | 2      | 4      | 0.70  |
| Cu I    | 327.40         | 29 | 0.00    | 3.79    | 1.38E+08 | 2      | 2      | 0.70  |
| Co I    | 345.35         | 27 | 0.43    | 4.02    | 1.10E+08 | 10     | 12     | 0.30  |

Physical and mechanical properties of the samples. HV is hardness by Vickers, R reflectivity, Lv latent heat, Cp specific heat, Tb is boiling point. The material properties are measured and subtracted from material tables.

|                   | Glass | Steel | Al alloy |
|-------------------|-------|-------|----------|
| <b>HV (-)</b>     | 980   | 180   | 95       |
| <b>R (%)</b>      | 0.78  | 0.96  | 0.90     |
| <b>Lv(J/kg)</b>   | 750   | 247   | 396      |
| <b>Cp(J/g °C)</b> | 0.84  | 0.47  | 0.22     |
| <b>Tb(°C)</b>     | 3265  | 2870  | 2480     |

### Signal-to-Background ratio derivation

The particular spectral line intensity in absence of self-absorption for plasma in local thermodynamic equilibrium (LTE) is given by following expression <sup>40</sup>:

$$q I_{ij}^S = \left( \frac{h\nu}{4\pi} \right) q n^S \frac{A_{ij}^S g_i^S}{q U^S(T)} \exp\left( \frac{-E_i^S}{k_B T_{exc}} \right), \quad (2)$$

where  $q I_{ij}^S$  (eV cm<sup>-3</sup> s<sup>-1</sup>) is the intensity of atomic or ionic line of element S,  $q$  is the ionization stage,  $i, j$  are the indexes of the higher and lower energetic quantum states of the same ionization stage  $q$ ,  $q n^S$  (cm<sup>-3</sup>) is the total number density of species S,  $A_{ij}^S$  (s<sup>-1</sup>) is the transition probability of upper level of species S,  $g_i^S$  (dimensionless) is degeneracy of the upper level,  $E_i^S$  (eV) is the excitation energy of upper level,  $T_{exc}$  (K) is the excitation temperature,  $k_B$  (eV K<sup>-1</sup>) is the Boltzmann constant,  $h$  (eV.s) is the Planck constant and  $q U^S(T)$  (*dimensionless*) is internal partition function of selected species at temperature  $T_{exc}$  (K):

$$q U^S(T) = \sum_i g_i e^{\frac{-E_i^S}{k_B T}}. \quad (3)$$

The Saha equilibrium relation between the number density of neutral and singly ionized species is given by:

$$n_e \frac{I n^S}{I n^S} = \frac{(2\pi m_e k_B T_{ion})^{\frac{3}{2}} 2 I U^S(T) e^{\frac{-E_{ion}^S - \Delta E_{ion}}{k_B T_{ion}}}}{h^3 I U^S(T)}, \quad (4)$$

where  $n_e$  (cm<sup>-3</sup>) is the electron density,  $I n^S$  and  $I n^S$  (cm<sup>-3</sup>) are the number densities of neutral and singly ionized species S,  $I U^S(T)$  and  $I I U^S(T)$  are the partition functions of respective species S indicated by superscript I and II,  $E_{ion}^S$  (eV) is the ionization energy of the respective element,  $\Delta E_{ion}$  the lowering in ionization energy and  $m_e$  (g) is the electron mass. By using Saha equation (4), the equation (2) becomes:

$$q I_{ij}^S = \left( \frac{h\nu}{4\pi} \right) n_e^{II} n^S T_{ion}^{-3/2} \frac{A_{ij}^S g_i^S}{2 I I U^S(T) (2\pi m k_B)^{3/2}} \left[ \exp\left( \frac{E_{ion}^S - \Delta E_{ion}}{k_B T_{ion}} - \frac{E_i^S}{k_B T_{exc}} \right) \right]. \quad (5)$$

As stated above the plasma continuum radiation results from recombination of ions and electrons and from interactions of free electrons with the electrical fields of ions (Bremsstrahlung). The expression for the continuum emission coefficient  $I_c(\lambda)$  in terms of wavelengths is given by equation (6) [35]:

$$I_c(\lambda) = \left( \frac{16\pi e^6}{3c^2 (6\pi m^3 k_B)^{1/2}} \right) \frac{n_e n^S}{\lambda_c^2 T_{ion}^{1/2}} \left[ \xi \left( 1 - \exp \frac{-hc}{\lambda k_B T_{ion}} \right) + G \exp \frac{-hc}{\lambda k_B T_{ion}} \right] \quad (6)$$

where  $G$  and  $\xi$  are the correction factors.  $G$  is the free-free Gaunt factor and  $\xi$  corrects free-bound continuum radiation. The values of  $G$  and  $\xi$  has been calculated for several gases as a function of temperature and electron density. Finally the signal to continuum ratio (SBR) is given by:

$$SBR(\lambda) = \left( \frac{h^4 3^{3/2} c^3}{256\pi^3 e^6 k_B} \right) \frac{A_{ij}^S g_i^S}{U^S(T)} \left( \frac{\lambda}{\Delta\lambda_{meas}} \right) \frac{1}{T_{ion}} \frac{\exp \left( \frac{-E_i^S}{k_B T_{exc}} \right) \exp \left( \frac{-E_{ion}^S - \Delta E_{ion}}{k_B T_{ion}} \right)}{\left[ \xi \left( 1 - \exp \frac{-hc}{\lambda k_B T_{ion}} \right) + G \exp \frac{-hc}{\lambda k_B T_{ion}} \right]} \quad (7)$$

**Determination coefficient R<sup>2</sup>:**

$$R^2 = 1 - \frac{SS_{res}}{SS_{tot}}$$

$$SS_{tot} = \sum_i (y_i - \bar{y})^2$$

$$SS_{res} = \sum_i (y_i - f_i)^2$$

where  $y_i$  is the  $i$ -th value from the observed dataset,  $\bar{y}$  is the mean of observed data,  $f_i$  is the predicted value associated with  $y_i$ .  $SS_{tot}$  is the total sum of squares (proportional to the variance of the data) and  $SS_{res}$  is the sum of squares of residuals.

---

Average determination coefficient and standard deviation for 30 best performing ANN architectures. Activation function of all ANN was logistic function.

---

| Number of neurons |         | Determination coefficient R <sup>2</sup> |       |
|-------------------|---------|------------------------------------------|-------|
| Layer 1           | Layer 2 | mean                                     | sd    |
| 45                | 23      | 0.967                                    | 0.005 |
| 43                | 18      | 0.967                                    | 0.004 |
| 50                | 37      | 0.966                                    | 0.008 |
| 23                | 41      | 0.966                                    | 0.002 |
| 46                | 19      | 0.965                                    | 0.004 |
| 47                | 30      | 0.965                                    | 0.002 |
| 43                | 15      | 0.965                                    | 0.004 |
| 40                | 16      | 0.965                                    | 0.002 |
| 35                | 25      | 0.965                                    | 0.001 |
| 42                | 18      | 0.964                                    | 0.004 |
| 47                | 31      | 0.964                                    | 0.003 |
| 46                | 26      | 0.964                                    | 0.005 |
| 32                | 44      | 0.964                                    | 0.008 |

|    |    |       |       |
|----|----|-------|-------|
| 49 | 32 | 0.964 | 0.003 |
| 23 | 35 | 0.963 | 0.002 |
| 50 | 23 | 0.963 | 0.004 |
| 43 | 29 | 0.962 | 0.004 |
| 20 | 42 | 0.962 | 0.011 |
| 46 | 25 | 0.962 | 0.004 |
| 31 | 25 | 0.962 | 0.007 |
| 32 | 42 | 0.961 | 0.005 |
| 37 | 23 | 0.961 | 0.007 |
| 37 | 26 | 0.961 | 0.007 |
| 29 | 15 | 0.960 | 0.003 |
| 47 | 21 | 0.960 | 0.003 |
| 34 | 29 | 0.960 | 0.002 |
| 36 | 30 | 0.960 | 0.006 |
| 37 | 33 | 0.960 | 0.005 |
| 23 | 33 | 0.959 | 0.006 |
| 44 | 30 | 0.959 | 0.006 |

---

Selected spectral lines with selected quantum parameters and R<sup>2</sup> (reference vs predicted SNR).

---

| Element | Wavelength | Ek    | Ak       | gk | Determination coefficient R2 |       |
|---------|------------|-------|----------|----|------------------------------|-------|
|         |            |       |          |    | mean                         | sd    |
| Fe I    | 406.36     | 4.61  | 6.65E+07 | 7  | 0.890                        | 0.071 |
| Ba II   | 455.40     | 2.72  | 1.11E+08 | 4  | 0.880                        | 0.051 |
| Mg I    | 280.27     | 4.42  | 2.57E+08 | 2  | 0.874                        | 0.124 |
| Si I    | 413.09     | 12.84 | 1.74E+08 | 8  | 0.869                        | 0.111 |
| Al I    | 396.15     | 3.14  | 9.85E+07 | 2  | 0.856                        | 0.025 |
| Al I    | 394.40     | 3.14  | 4.99E+07 | 2  | 0.815                        | 0.210 |
| Zn I    | 330.26     | 7.78  | 1.20E+08 | 5  | 0.800                        | 0.146 |
| Mg I    | 279.55     | 4.43  | 2.60E+08 | 4  | 0.777                        | 0.251 |
| Al I    | 309.27     | 4.02  | 7.29E+07 | 6  | 0.773                        | 0.100 |
| Ca I    | 315.89     | 7.05  | 3.10E+08 | 4  | 0.727                        | 0.090 |
| Si I    | 288.16     | 5.08  | 2.17E+08 | 3  | 0.682                        | 0.326 |
| Cu I    | 324.75     | 3.82  | 1.40E+08 | 4  | 0.677                        | 0.089 |
| Fe I    | 404.58     | 4.55  | 8.62E+07 | 9  | 0.655                        | 0.187 |
| Fe I    | 387.25     | 4.19  | 1.05E+07 | 5  | 0.654                        | 0.092 |
| Na I    | 589.00     | 2.10  | 6.16E+07 | 4  | 0.619                        | 0.041 |
| B I     | 249.77     | 4.96  | 1.68E+08 | 2  | 0.588                        | 0.478 |
| Mn I    | 294.92     | 5.38  | 1.96E+08 | 7  | 0.560                        | 0.140 |
| Zn I    | 334.50     | 7.78  | 1.70E+08 | 7  | 0.529                        | 0.271 |
| K I     | 766.49     | 1.62  | 3.78E+07 | 4  | 0.519                        | 0.173 |
| Fe I    | 390.29     | 4.73  | 2.14E+07 | 7  | 0.508                        | 0.279 |
| Sr II   | 421.55     | 2.94  | 1.28E+08 | 2  | 0.477                        | 0.056 |

|       |        |       |          |    |       |       |
|-------|--------|-------|----------|----|-------|-------|
| Mg I  | 285.21 | 4.35  | 4.91E+08 | 3  | 0.449 | 0.127 |
| Mg I  | 389.19 | 10.36 | 1.77E+08 | 5  | 0.431 | 0.282 |
| Cu I  | 327.40 | 3.79  | 1.38E+08 | 2  | 0.429 | 0.245 |
| Fe I  | 389.97 | 3.27  | 2.58E+06 | 5  | 0.421 | 0.186 |
| Fe I  | 374.95 | 4.22  | 7.63E+07 | 9  | 0.399 | 0.127 |
| Ca I  | 393.37 | 3.15  | 1.47E+08 | 4  | 0.377 | 0.216 |
| Fe I  | 376.38 | 4.28  | 5.44E+07 | 5  | 0.322 | 0.086 |
| Ba II | 493.41 | 2.51  | 9.53E+07 | 2  | 0.295 | 0.343 |
| Ca I  | 396.85 | 3.12  | 1.40E+08 | 2  | 0.286 | 0.276 |
| Al I  | 394.40 | 3.14  | 4.99E+07 | 2  | 0.283 | 0.068 |
| Fe I  | 372.76 | 4.28  | 2.24E+07 | 5  | 0.277 | 0.060 |
| Fe I  | 382.04 | 4.10  | 6.67E+07 | 9  | 0.252 | 0.225 |
| Fe I  | 382.78 | 4.80  | 1.05E+08 | 5  | 0.202 | 0.084 |
| Al I  | 309.27 | 4.02  | 7.29E+07 | 6  | 0.195 | 0.108 |
| Cr I  | 425.44 | 2.91  | 3.15E+07 | 9  | 0.191 | 0.197 |
| Ni I  | 352.45 | 3.54  | 1.00E+08 | 5  | 0.186 | 0.300 |
| Mn I  | 403.08 | 3.08  | 1.70E+07 | 8  | 0.141 | 0.098 |
| Fe I  | 376.55 | 6.53  | 9.51E+07 | 15 | 0.137 | 0.077 |
| Fe I  | 375.82 | 4.26  | 6.34E+07 | 7  | 0.130 | 0.101 |
| Fe I  | 373.49 | 4.18  | 9.01E+07 | 11 | 0.115 | 0.159 |
| Zn I  | 334.50 | 7.78  | 1.70E+08 | 7  | 0.100 | 0.133 |
| Fe I  | 373.71 | 3.37  | 1.41E+07 | 9  | 0.081 | 0.056 |
| Fe I  | 368.75 | 4.22  | 8.00E+06 | 9  | 0.073 | 0.047 |
| Co I  | 345.35 | 4.02  | 1.10E+08 | 12 | 0.069 | 0.044 |
| Ni I  | 301.20 | 4.54  | 1.30E+08 | 5  | 0.067 | 0.053 |
| Fe I  | 374.34 | 4.30  | 2.60E+07 | 3  | 0.066 | 0.018 |
| Zn I  | 330.26 | 7.78  | 1.20E+08 | 5  | 0.062 | 0.047 |
| Ni I  | 231.60 | 6.39  | 2.88E+08 | 8  | 0.055 | 0.052 |
| Fe I  | 372.26 | 3.42  | 4.97E+06 | 5  | 0.041 | 0.020 |

---
